# Supplementary material for: Water soluble quantum dots as hydrophilic carriers and two-photon excited energy donors in photodynamic therapy
Source: Royal Society of Chemistry journal article supplement (doi:10.1039/c2jm00096b), 2012-01-01
Supplement: c2jm00096b.pdf [file c2jm00096b.pdf]

## Supporting Information

# Water Soluble Quantum Dots as Hydrophilic Carriers and Two-Photon Excited Energy Donors in Photodynamic Therapy.

Colin Fowley<sup>1</sup>, Nikolitsa Nomikou,<sup>2</sup> Anthony P McHale<sup>1</sup> Paul A McCarron<sup>1</sup>, Bridgeen McCaughan<sup>1\*</sup> and John F Callan<sup>1\*</sup>

*1. Department of Pharmacy and Pharmaceutical Sciences, School of Biomedical Sciences, The University of Ulster, Northern Ireland, BT52 1SA. 2. Sonidel Ltd. Dublin 5, Republic of Ireland*

- Figure S1: Absorbance and Fluorescence Spectra of QD-MPA
- Figure S2: UV-Vis spectrum of **QD-1**
- Figure S3: Photographs of **QD-1**, 1 week, 1 month and 2 months after preparation.
- Figure S4: Singlet oxygen production of QD-MPA upon irradiation at 400 nm using DPBF assay.
- Figure S5: Confocal fluorescence image of HeLa cells incubated with DHFA before and after two-photon irradiation
- Figure S6: Phase contrast images of HeLa cells incubated with DHFA before and after two photon irradiation.
- Figure S7: Phase contrast images of HeLa cells incubated with DHFA and **QD-1** before and after two photon irradiation
- Figure S8: TEM and DLS information for QD-1.
- Figure S9: Singlet oxygen production of QD-1 upon at pH6.8 using DPBF assay.
- Figure S10: Determination of FRET efficiency.

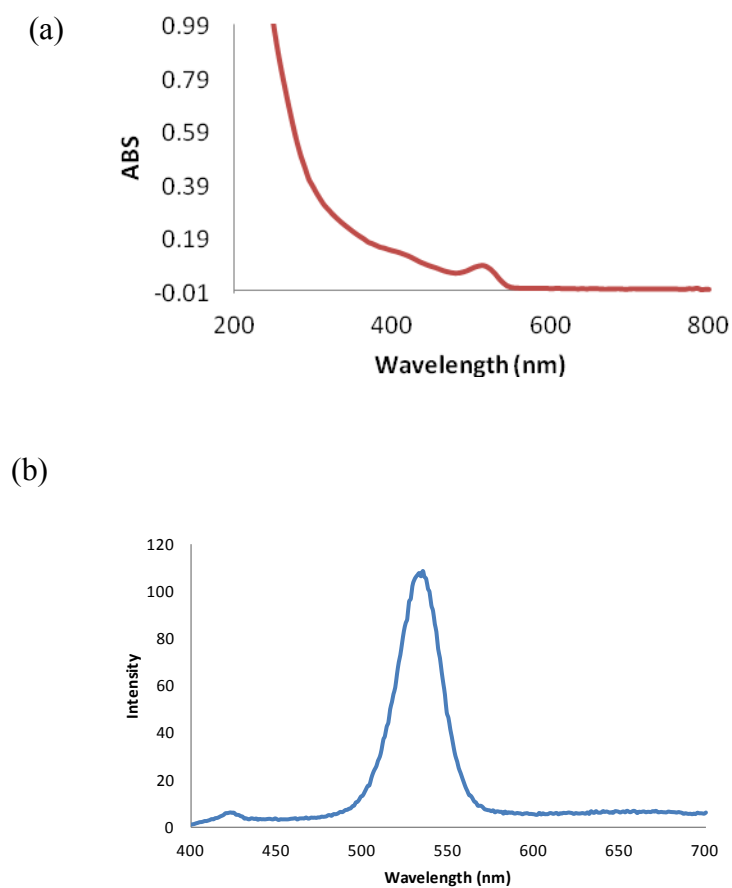

**Figure S1** (a) Absorbance and (b) fluorescence spectra of QD-MPA recorded in H<sub>2</sub>O.

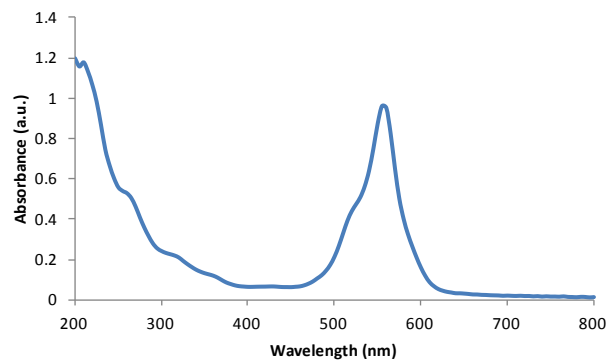

**Figure S2** Absorbance spectrum of **QD-1** recorded in PBS solution.

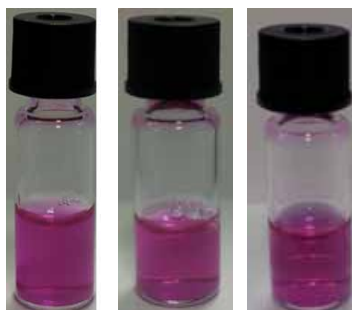

**Figure S3** Photograph of **QD-1** solution after 1 week (left vial), 1 month (middle vial) and 2 months (right vial) showing no evidence of aggregation.

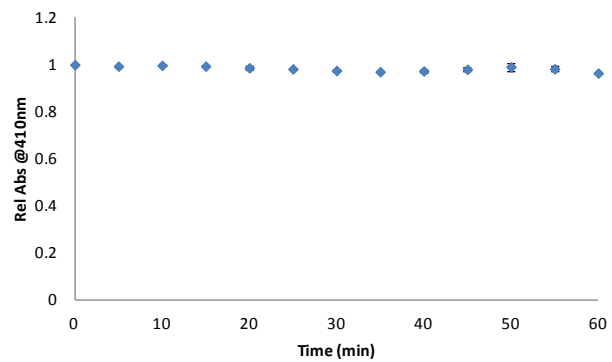

**Figure S4** Plot of relative absorbance of DPBF against time for QD-MPA irradiated at 400 nm.

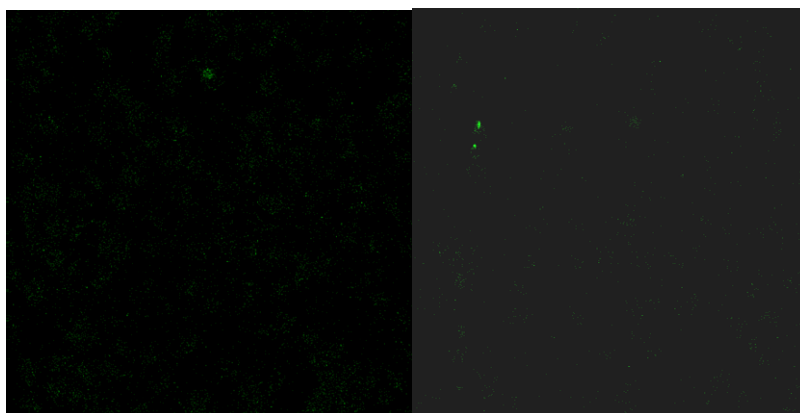

**Figure S5** Confocal fluorescence images of HeLa cells incubated with DHFA (a) before and (b) after two-photon irradiation at 800 nm.

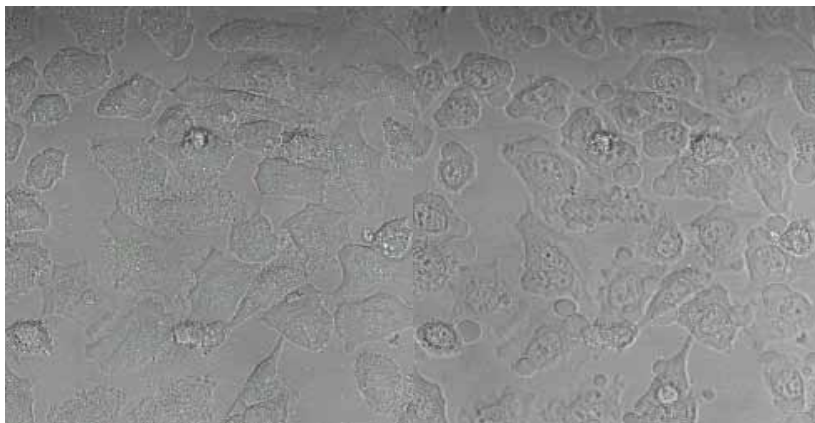

**Figure S6** Phase contrast images of HeLa cells incubated with DHFA before (left) and after (right) two-photon irradiation at 800 nm.

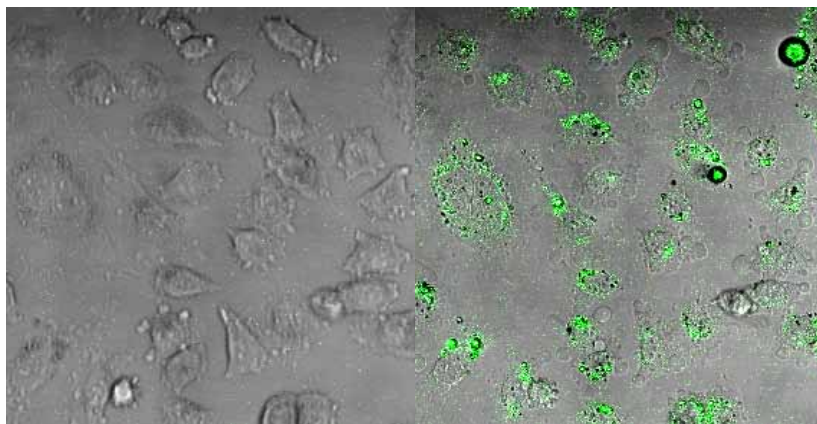

**Figure S7** Phase contrast images of HeLa cells incubated with DHFA and **QD-1** before (left) and after (right) two-photon irradiation at 800 nm.



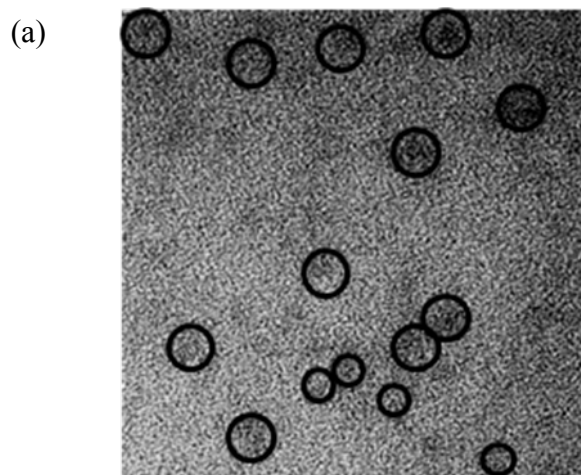

(b)

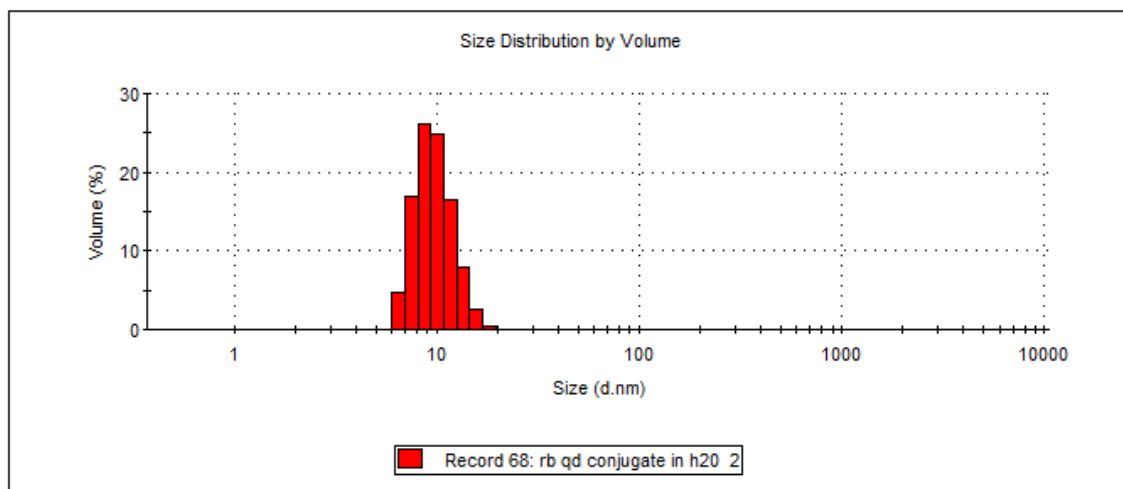

**Figure S8** (a) TEM image and (b) DLS trace of **QD-1**.

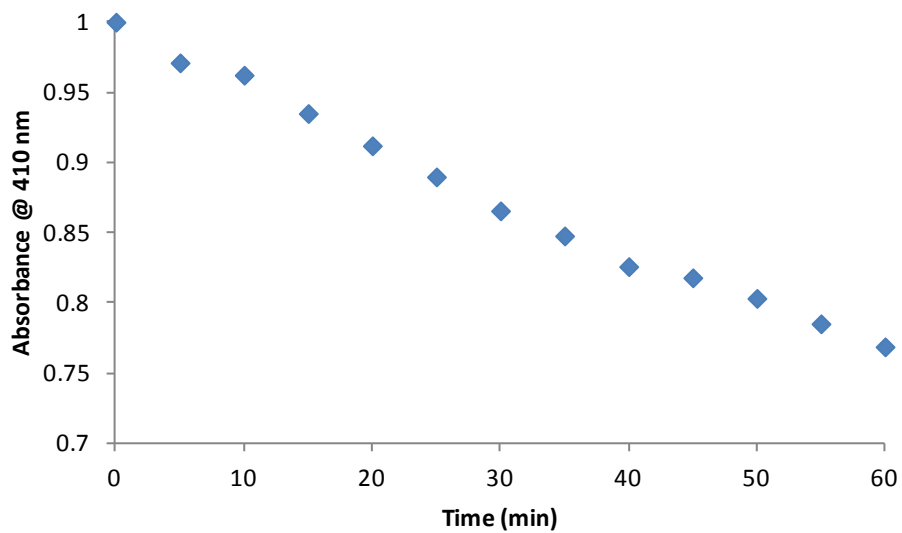

**Figure S9** Plot of DPBF absorbance at 410 nm against time for a solution **QD-1** buffered at pH 6.8

### Determination of FRET efficiency.

We have calculated the FRET efficiency using the following equation derived for Donor-Acceptor pairs with only one acceptor. (Tsay et al, J. Am. Chem. Soc, 2007, 129, 6865)

$$E = R_0^6 / R_0^6 + r^6$$

where:  $R_0$  = the Förster radius i.e. the QD-PS separation distance at which energy transfer is 50% and  $r$  = actual donor acceptor distance.

Assuming multiple acceptors present on the one donor molecule the equation becomes: (Clapp et al., J. Am. Chem. Soc 2004, 126, 301)

$$E = nR_0^6 / nR_0^6 + r^6$$

where  $n$  = number of acceptors per QD.

$R_0$  can be calculated from the following equation:

$$R_0^6 = 8.785 \times 10^{-5} K^2 QD^0 J/n^4$$

where  $K^2$  is the orientation factor between donor and acceptor molecules which has been established by Clapp et al as 2/3 for QD-dye conjugates,  $QD^0$  is the quantum yield of the QD in the absence of acceptor, and  $n$  is the index of refraction, usually taken as 1.4.  $J$  is the overlap integral between the fluorescence spectrum of the donor and the molar absorption spectrum of the acceptor.

$J$  can be calculated from the following equation:

$$J = \int F_D(\lambda) \varepsilon_A(\lambda) \lambda^4 d\lambda$$

where:  $F_D$  is the peak-normalized fluorescence spectrum of the donor and  $\varepsilon_A$  is the absorption spectrum of the acceptor.

Using these equations, an  $R_0$  value of 43.9 Å was calculated leading to a FRET efficiency of 73.0% for 1 acceptor per QD molecule and 99.4% for 64 acceptors as determined for QD-1.
